# Supplementary material for: Mussel inspired functionalization of carbon nanotubes for heavy metal ion removal
Source: Royal Society of Chemistry journal article supplement (doi:10.1039/c5ra08908e), 2015-01-01
Supplement: c5ra08908e1.pdf [file c5ra08908e1.pdf]

## **Mussel Inspired Functionalization of Carbon Nanotubes for Heavy Metal Ion Removal**

Yili Xie<sup>a</sup>, Qiang Huang<sup>b</sup>, Ke Wang<sup>c</sup>, Meiyong Liu<sup>b</sup>, Qing Wan<sup>b</sup>, Fengjie Deng<sup>b</sup>, Long Lu<sup>a,\*</sup>, Xiaoyong Zhang<sup>b,\*</sup>, Yen Wei<sup>c,\*</sup>

<sup>a</sup> Department of Environmental and Chemical Engineering, <sup>b</sup> Department of Chemistry and Jiangxi Provincial Key Laboratory of New Energy Chemistry, Nanchang University, 999 Xuefu Avenue, Nanchang 330031, China. <sup>b</sup> Department of Chemistry and the Tsinghua Center for Frontier Polymer Research, Tsinghua University, Beijing, 100084, P. R. China.

[xiaoyongzhang1980@gmail.com](mailto:xiaoyongzhang1980@gmail.com); [weiyen@tsinghua.edu.cn](mailto:weiyen@tsinghua.edu.cn), [lulong@ncu.edu.cn](mailto:lulong@ncu.edu.cn).

## Results

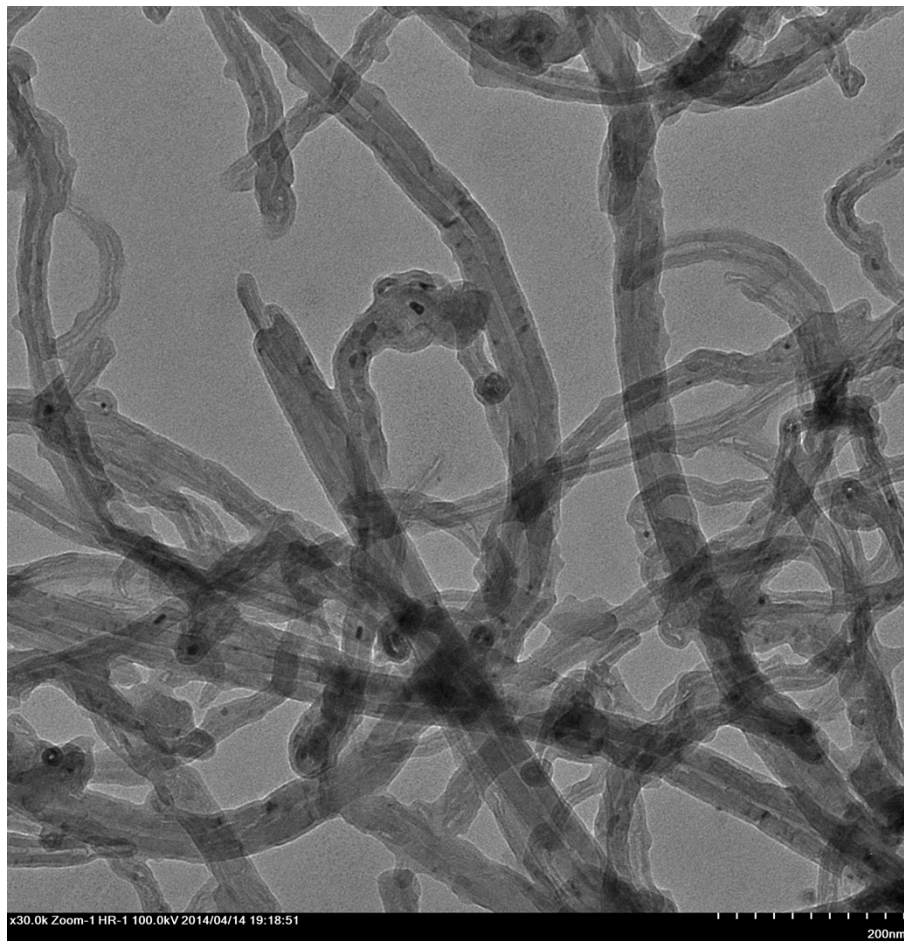

**Fig. S1** Representative TEM image of CNT-PDA. The PDA coating on the CNTs can be clearly observed. Scale bar = 200 nm

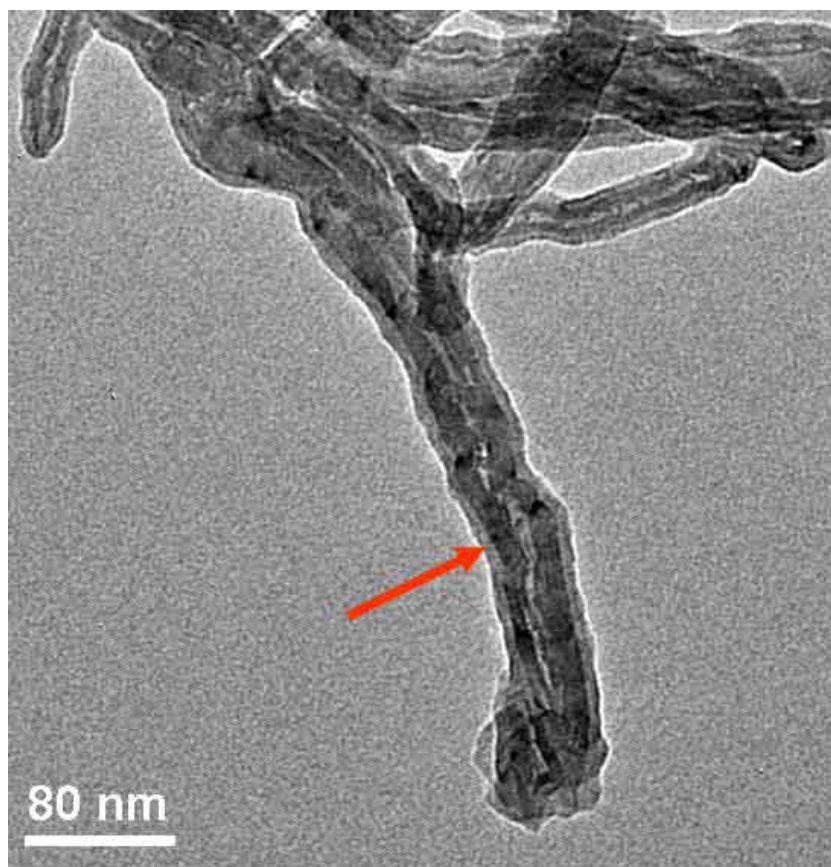

**Fig. S2** Enlarged TEM image of CNT-PDA-PEI. Scale bar = 80 nm.

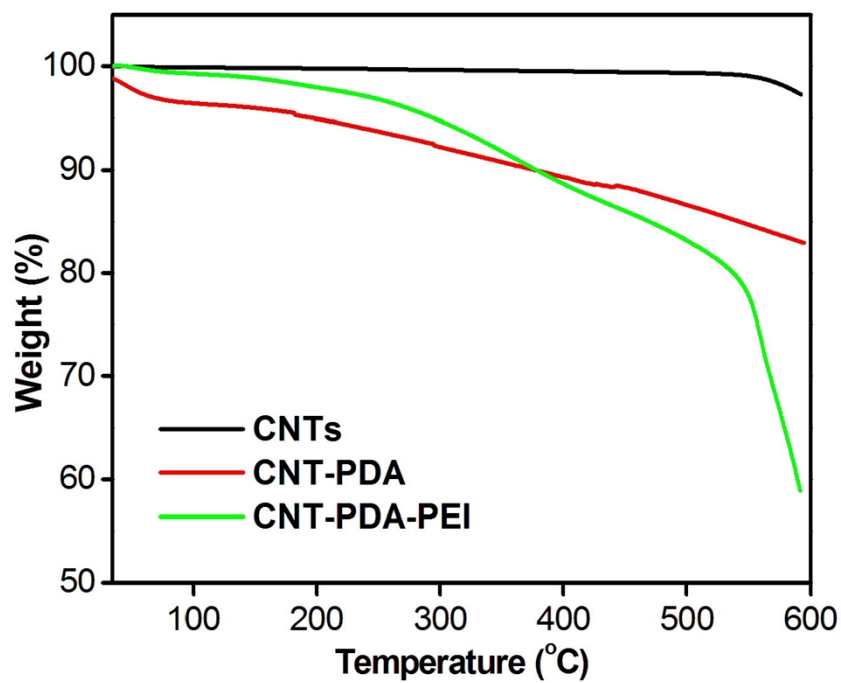

**Fig. S3** TGA curves of pristine CNTs, CNT-PDA and CNT-PDA-PEI nanoparticles, respectively.
